# Supplementary material
Source: PubMed Central journal article supplement (PMC2919925)
Supplement: 1004519107_pnas.201004519SI.pdf [file 1004519107_pnas.201004519SI.pdf]

# Supporting Information

Munday et al. 10.1073/pnas.1004519107

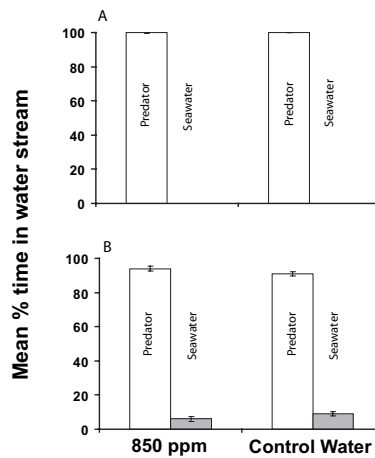

**Fig. S1.** Comparison of larval responses when tested in treatment [850 ppm carbon dioxide ( $\text{CO}_2$ )] and control water in the flume. The figure shows, for each water type, the mean percent time ( $\pm$  standard deviation (SD)) that larval clownfishes (A) and damselfishes (B) that had been reared at 850 ppm  $\text{CO}_2$  spent in the water stream containing the predator cue vs. the water stream without the cue. Clownfish ( $n = 30$ ) had been reared from hatching for 10 d in the  $\text{CO}_2$  treatment. Damselfish ( $n = 20$ ) had been reared for 4 d from capture in the  $\text{CO}_2$  treatment.

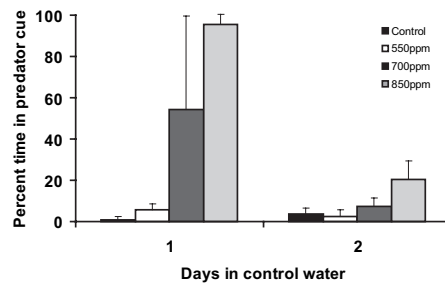

**Fig. S2.** Latency of behavioral responses by larval *Pomacentrus wardi* after exposure to elevated  $\text{CO}_2$ . Shown is the percent time ( $\pm$  SD) that larvae spent in the stream of water containing the chemical cue from a common predator after exposure to different levels of  $\text{CO}_2$  for 4 d and then transfer to control water for 1 or 2 d. Behavioral responses were tested in the two-channel flume chamber where larvae were free to move between a stream of water containing the chemical cue of a common predator (*Pseudochromis fuscus*) and a water stream without the predator cue. Ten larvae from each  $\text{CO}_2$  concentration were tested each day ( $n = 80$ ).

**Table S1. Number of individuals tested in flume experiments at each ontogenetic stage and CO<sub>2</sub> treatment**

| Day                  | Control | 550 ppm | 700 ppm | 850 ppm |
|----------------------|---------|---------|---------|---------|
| Clownfish (Fig. 1)   |         |         |         |         |
| 1                    | 22      | 22      | 22      | 22      |
| 2                    | 22      | 22      | 22      | 22      |
| 3                    | 22      | 22      | 22      | 22      |
| 4                    | 20      | 20      | 20      | 20      |
| 5                    | 20      | 20      | 20      | 20      |
| 6                    | 22      | 22      | 22      | 22      |
| 8                    | 18      | 22      | 22      | 22      |
| 10                   | 25      | 25      | 25      | 25      |
| Clownfish (Fig. 2A)  |         |         |         |         |
| 1                    | 10      | 10      | 10      | 10      |
| 2                    | 10      | 10      | 10      | 10      |
| 3                    | 10      | 10      | 10      | 10      |
| 4                    | 10      | 10      | 10      | 10      |
| Damselfish (Fig. 2B) |         |         |         |         |
| 1                    | 10      | 10      | 10      | 10      |
| 2                    | 10      | 10      | 10      | 10      |
| 3                    | 17      | 10      | 10      | 17      |
| 4                    | 20      | 10      | 109*    | 20      |

Each cell corresponds to a bar on the relevant figure.

\*Includes fish that were flume tested for field experiment.
